# Supplementary material
Source: HighWire-hosted journal article supplement (https://bmjophth.bmj.com/content/9/1/e001393)
Supplement: inline-supplementary-material-1 [file inline-supplementary-material-1.pdf]

## 1 SUPPLEMENTAL MATERIAL

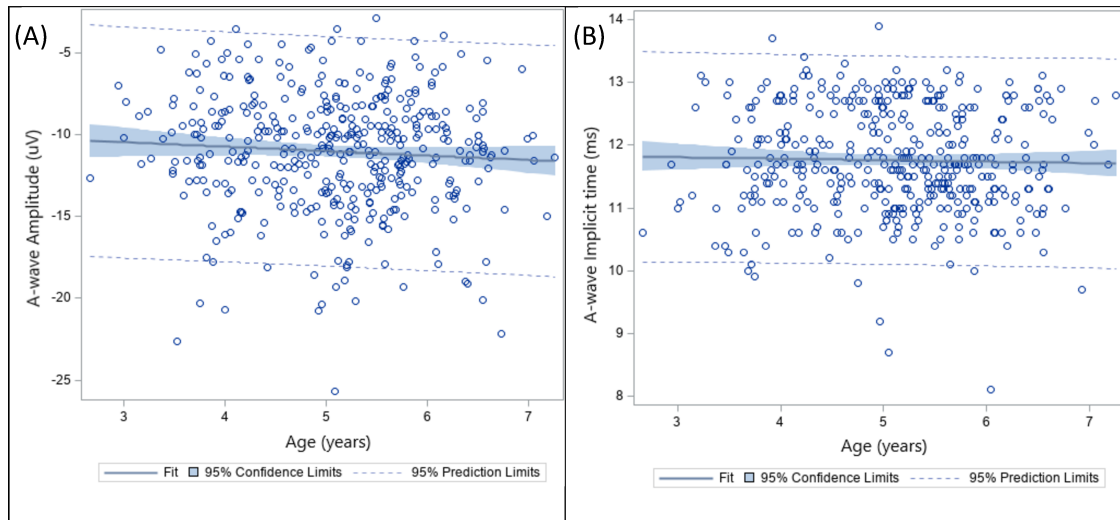

2 [Supplementary Figure 1] Pearson correlations between (A) a-wave amplitude (B) a-wave

3 implicit time and age

4

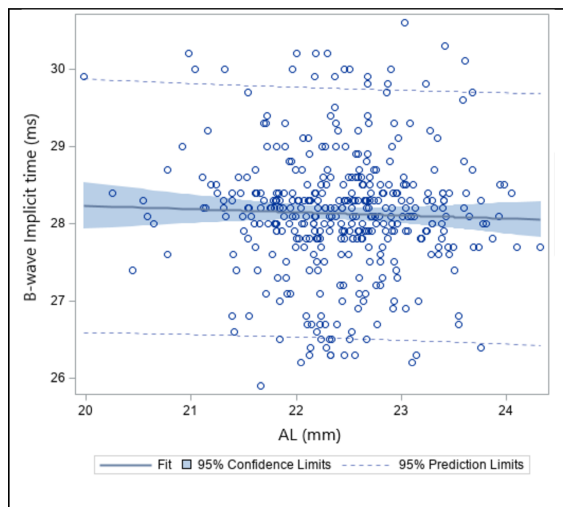

5 [Supplementary Figure 2] Pearson correlation between b-wave implicit time and AL

6

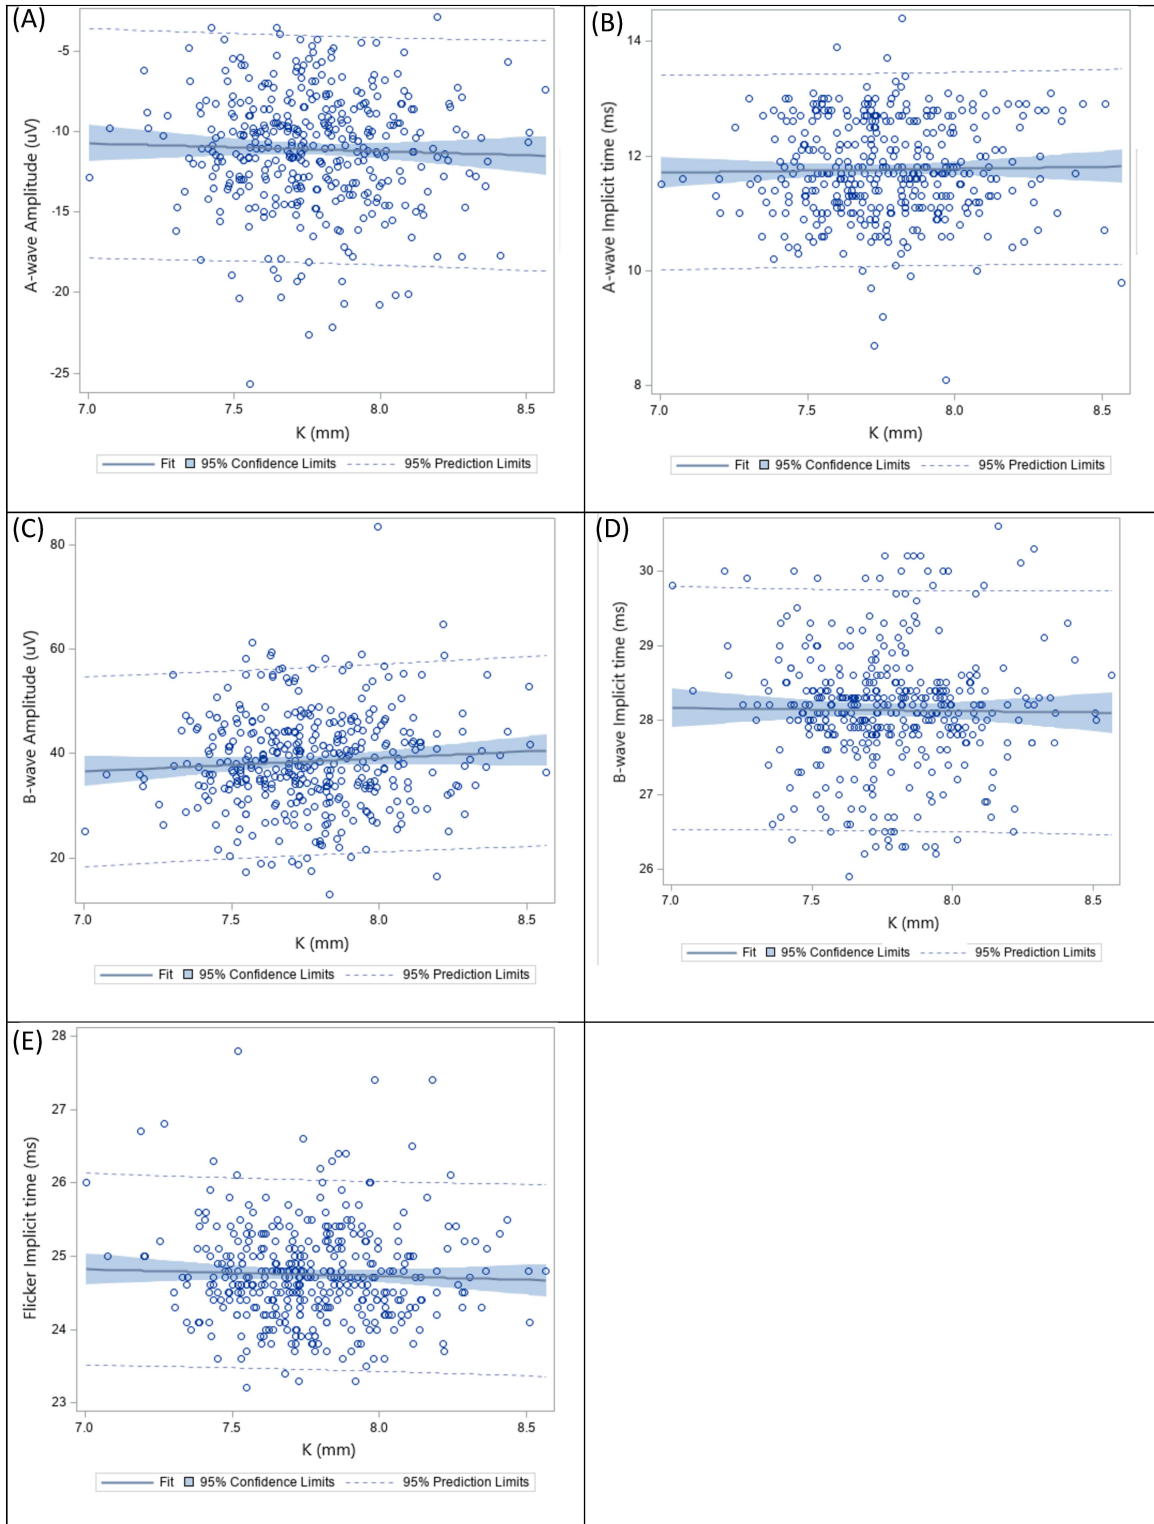

7 [Supplementary Figure 3] Pearson correlations between (A) a-wave amplitude (B) a-wave  
8 implicit time (C) b-wave amplitude (D) b-wave implicit time (E) 30Hz flicker implicit time and  
9 K  
10

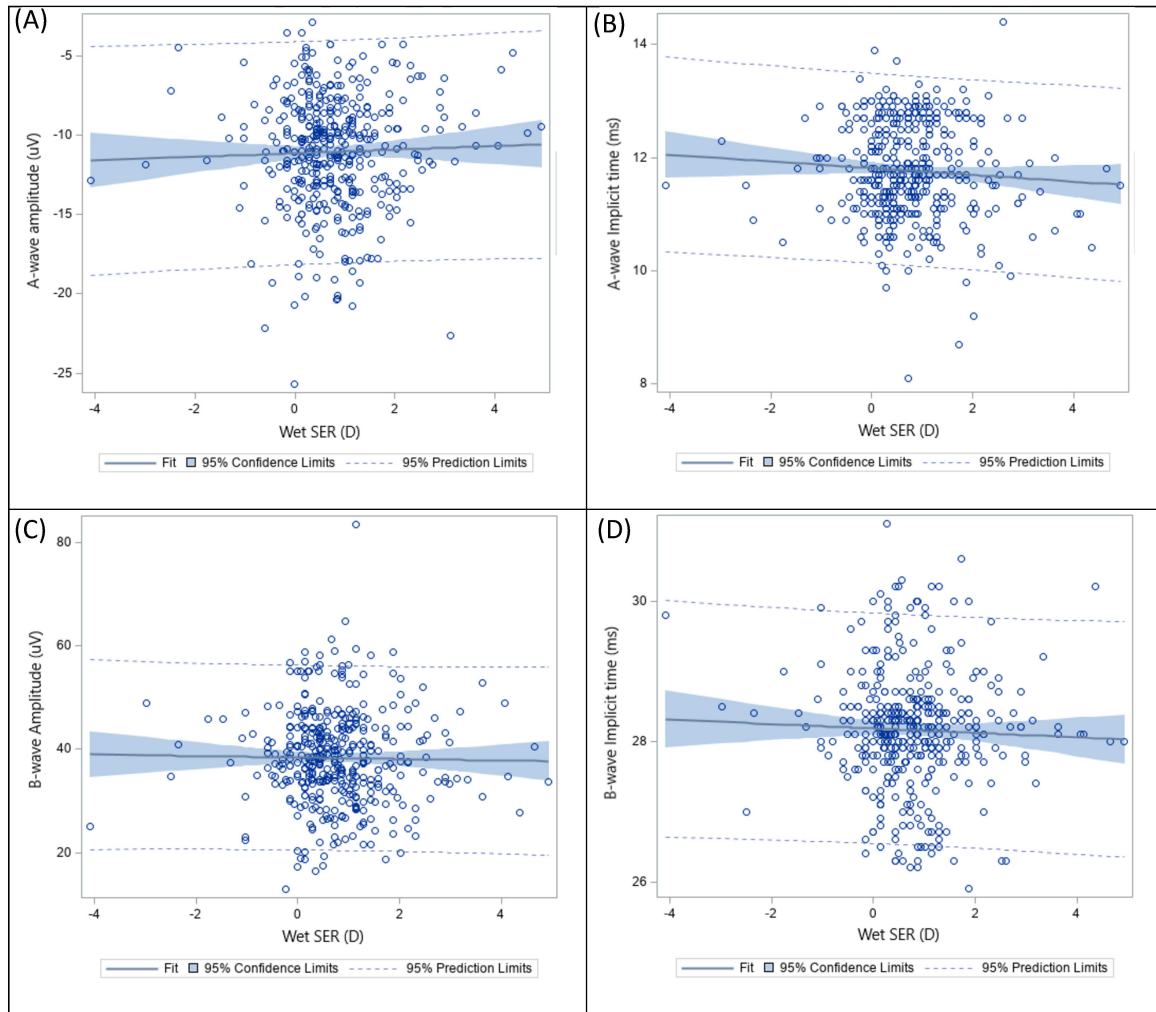

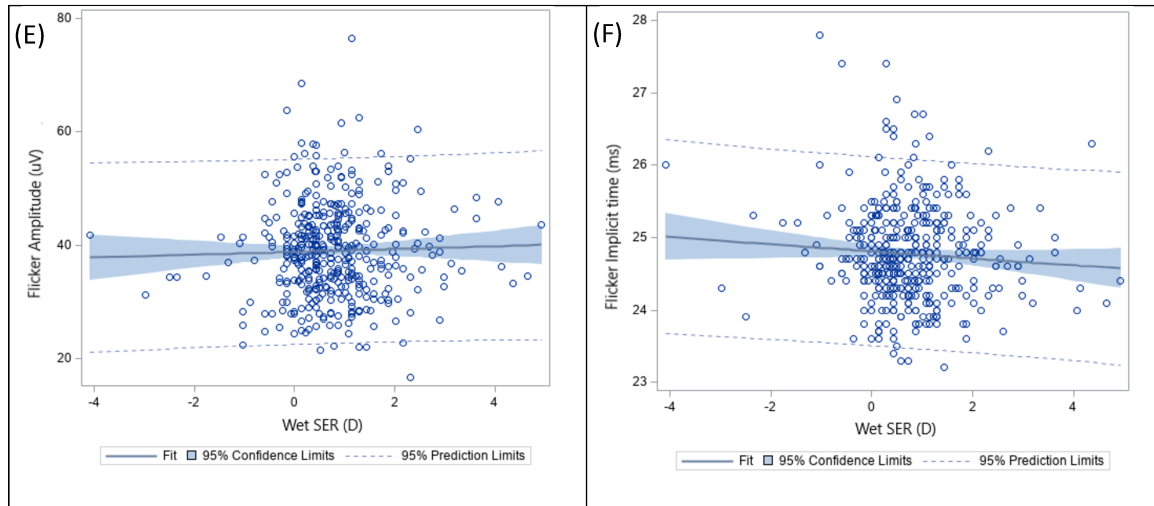

11 **[Supplementary Figure 3]** Pearson correlations between (A) a-wave amplitude (B) a-wave  
 12 implicit time (C) b-wave amplitude (D) b-wave implicit time (E) 30Hz flicker amplitude (F)  
 13 30Hz flicker implicit time and K

14

15

16 **[Supplementary Table 1]** The 5<sup>th</sup> – 95<sup>th</sup> percentile range of photopic a- and b-wave responses  
 17 and 30-Hz flicker responses

18

19

20

21

22

23

24

25

|                           | Percentiles     |                  |                  |                  |                  |
|---------------------------|-----------------|------------------|------------------|------------------|------------------|
|                           | 5 <sup>th</sup> | 25 <sup>th</sup> | 50 <sup>th</sup> | 75 <sup>th</sup> | 95 <sup>th</sup> |
| <u>Amplitude (µV)</u>     |                 |                  |                  |                  |                  |
| A-wave                    | -17.80          | -13.00           | -10.40           | -8.50            | -5.40            |
| B-wave                    | 23.22           | 32.10            | 37.40            | 43.20            | 54.68            |
| 30-Hz flicker             | 26.03           | 33.33            | 38.80            | 43.60            | 53.00            |
| <u>Implicit time (ms)</u> |                 |                  |                  |                  |                  |
| A-wave                    | 10.50           | 11.20            | 11.70            | 12.50            | 13.00            |
| B-wave                    | 26.70           | 27.80            | 28.20            | 28.50            | 29.80            |
| 30-Hz flicker             | 23.80           | 24.35            | 24.70            | 25.20            | 26.00            |

- 26 **[Supplementary Table 2]** Correlations of a-wave and b-wave of photopic ERG responses, 30-  
 27 Hz flicker responses for AL, K and SER.

|                                    | AL                      |         | K                       |         | SER                     |         |
|------------------------------------|-------------------------|---------|-------------------------|---------|-------------------------|---------|
|                                    | Correlation coefficient | P value | Correlation coefficient | P value | Correlation coefficient | P value |
| A-wave Amplitude ( $\mu$ V)        | -0.131                  | 0.005*  | -0.056                  | 0.253   | 0.061                   | 0.195   |
| A-wave Implicit time (ms)          | 0.116                   | 0.014*  | 0.012                   | 0.800   | -0.090                  | 0.057   |
| B-wave Amplitude ( $\mu$ V)        | 0.148                   | 0.002*  | 0.070                   | 0.149   | -0.020                  | 0.679   |
| B-wave Implicit time (ms)          | -0.050                  | 0.285   | -0.004                  | 0.930   | -0.047                  | 0.321   |
| 30-Hz Flicker Amplitude ( $\mu$ V) | 0.142                   | 0.003*  | 0.128                   | 0.010*  | 0.036                   | 0.456   |
| 30-Hz Flicker Implicit time (ms)   | -0.100                  | 0.038*  | -0.050                  | 0.320   | -0.067                  | 0.164   |

- 28 *An asterisk indicates statistical significance*
